# Supplementary material
Source: PubMed Central journal article supplement (PMC8123493)
Supplement: mmc2.pdf [file mmc2.pdf]

# Supporting information for Vaccine-escape and fast-growing mutations in the United Kingdom, the United States, Singapore, Spain, India, and other COVID-19-devastated countries

Rui Wang<sup>1</sup>, Jiahui Chen<sup>1</sup>, Kaifu Gao<sup>1</sup>, and Guo-Wei Wei<sup>1,2,3\*</sup>

<sup>1</sup> Department of Mathematics,

Michigan State University, MI 48824, USA.

<sup>2</sup> Department of Electrical and Computer Engineering,  
Michigan State University, MI 48824, USA.

<sup>3</sup> Department of Biochemistry and Molecular Biology,  
Michigan State University, MI 48824, USA.

April 29, 2021

## Contents

|                                                                                   |          |
|-----------------------------------------------------------------------------------|----------|
| <b>S1 BFE changes following 551 non-degenerate mutations on the S protein RBD</b> | <b>1</b> |
| <b>S2 106 antibodies with their corresponding PDB IDs</b>                         | <b>3</b> |
| <b>S3 Supplementary Data</b>                                                      | <b>3</b> |
| <b>S4 Supplementary Figures</b>                                                   | <b>4</b> |

---

\*Corresponding author. Email: [weig@msu.edu](mailto:weig@msu.edu)

# S1 BFE changes following 551 non-degenerate mutations on the S protein RBD

Figure S1-Figure S5 plot the BFE changes for the complexes of S protein and ACE2 for all 551 non-degenerate mutations on the S protein RBD. Frequency information has been indicated. It is worthy to note the disparity between the BFE magnitudes for binding-strengthening mutations and binding-weakening mutations. Such a disparity indicates that the SARS-CoV-2 has been relatively adapted for human infection.

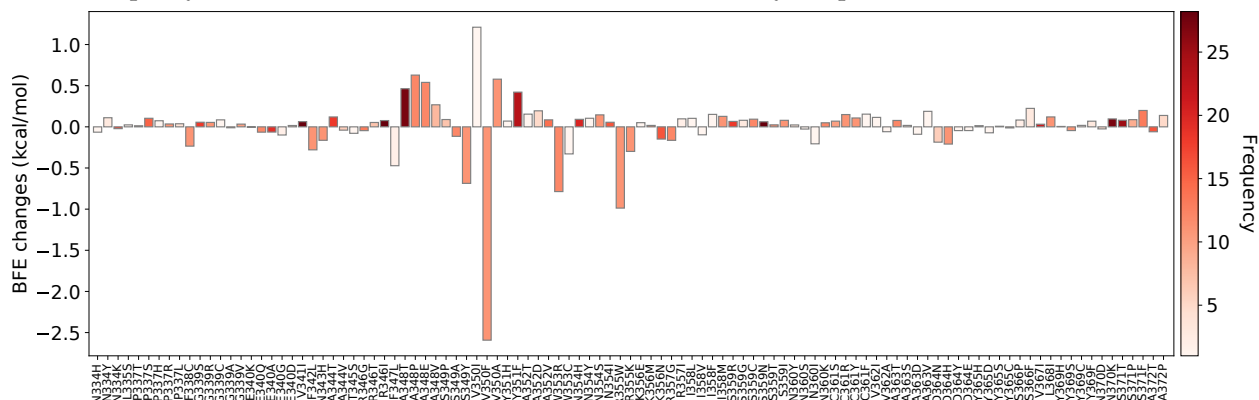

Figure S1: Illustration of the BFE changes for the complexes of S protein and ACE2 following all 551 non-degenerate mutations on the S protein RBD. The frequency shows the number of detections in the database.

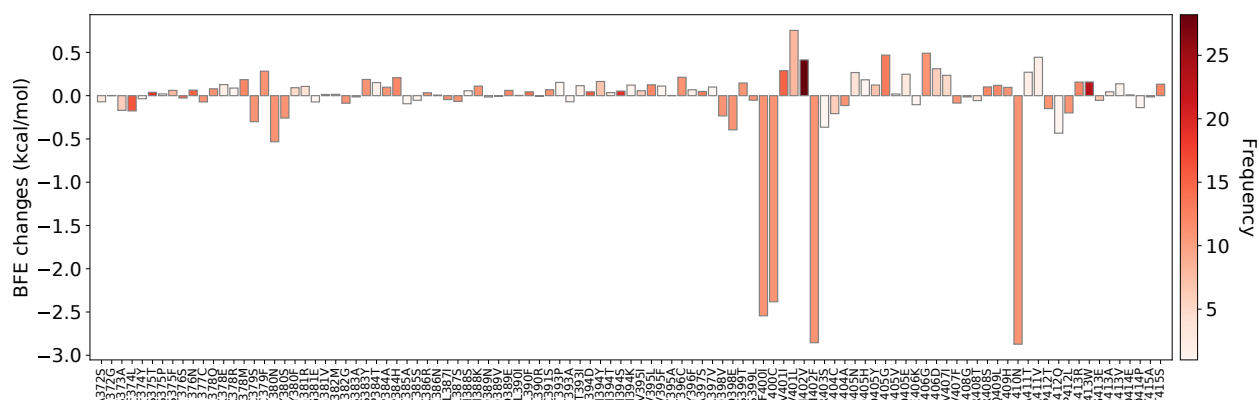

Figure S2: (Continue) Illustration of the BFE changes for the complexes of S protein and ACE2 following all 551 non-degenerate mutations on the S protein RBD. The frequency shows the number of detections in the database.

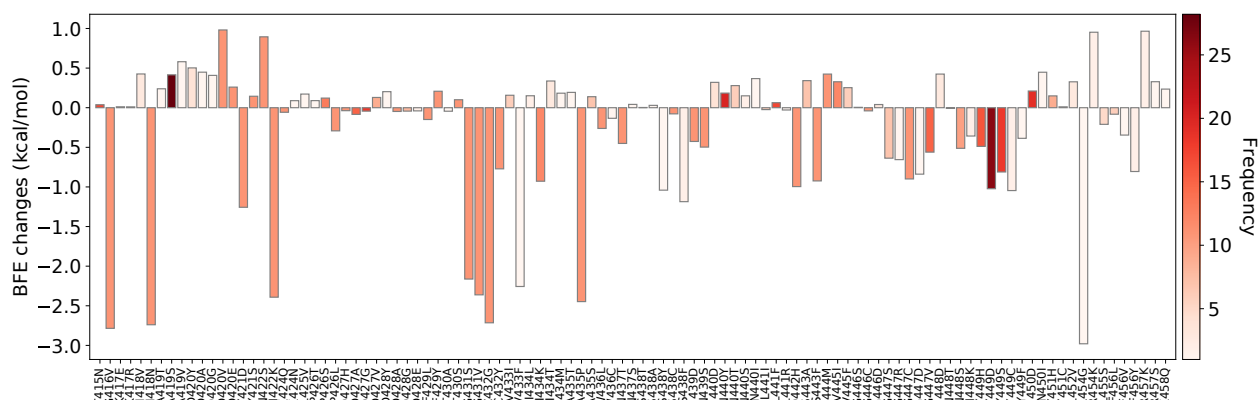

Figure S3: (Continue) Illustration of the BFE changes for the complexes of S protein and ACE2 following all 551 non-degenerate mutations on the S protein RBD. The frequency shows the number of detections in the database.

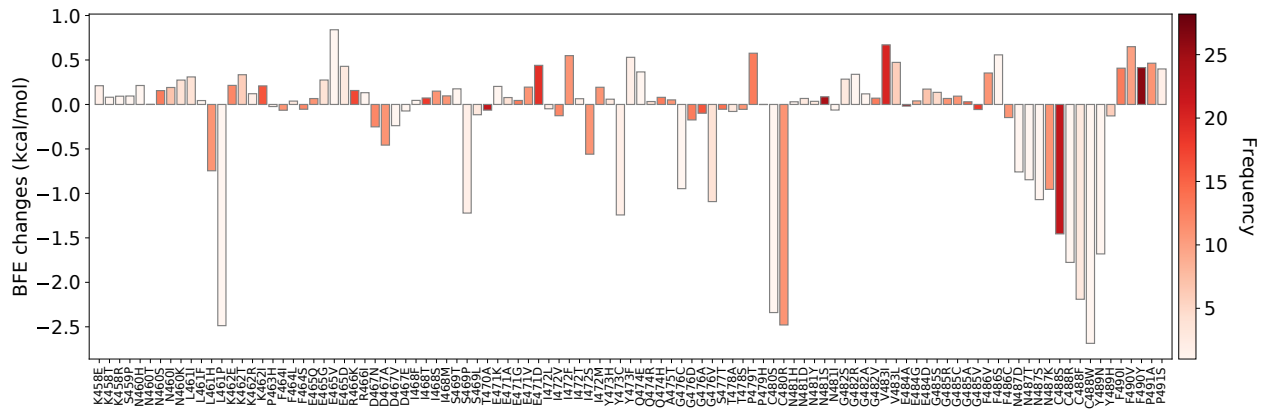

Figure S4: (Continue) Illustration of the BFE changes for the complexes of S protein and ACE2 following all 551 non-degenerate mutations on the S protein RBD. The frequency shows the number of detections in the database.

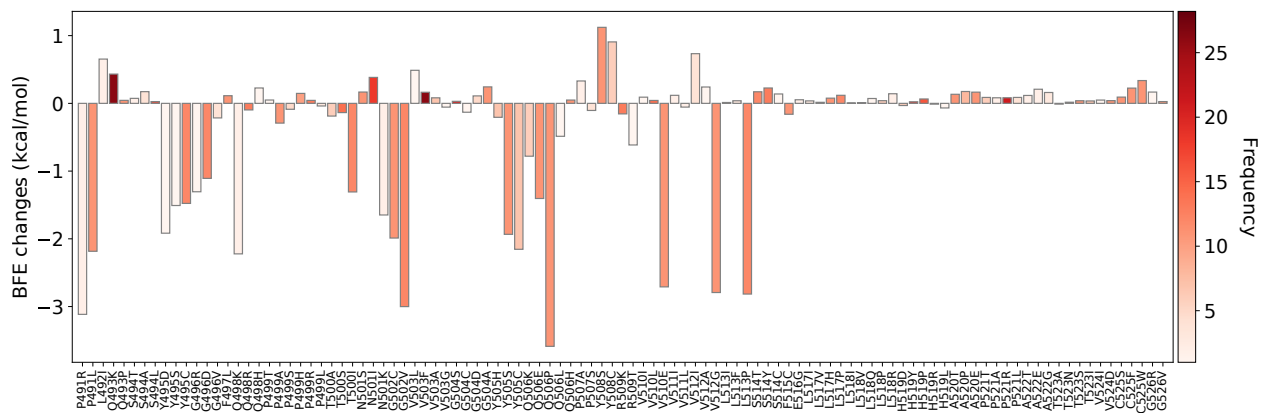

Figure S5: (Continue) Illustration of the BFE changes for the complexes of S protein and ACE2 following all 551 non-degenerate mutations on the S protein RBD. The frequency shows the number of detections in the database.

## S2 106 antibodies with their corresponding PDB IDs

| PDB ID | Antibodies       | PDB ID | Antibodies        | PDB ID | Antibodies       |
|--------|------------------|--------|-------------------|--------|------------------|
| 6W41   | CR3022           | 6WPS   | S309              | 6XC2   | CC12.1           |
| 6XC3   | CC12.1/CR3022    | 6XC4   | CC12.3            | 6XC7   | CC12.3/CR3022    |
| 6XCM   | C105             | 6XDG   | REGN10933/10987   | 6XE1   | CV30             |
| 6XEY   | Fab 2-4          | 6XKP   | CV07-270          | 6XKQ   | CV07-250         |
| 6YZ5   | H11-D4           | 6Z2M   | CR3022/H11-D4     | 6ZBP   | H11-H4           |
| 6ZCZ   | EY6Z/Nb          | 6ZER   | EY6Z              | 7A29   | Sb23             |
| 7B3O   | STE90-C11        | 7BWJ   | P2B-2F6           | 7BYR   | BD23             |
| 7BZ5   | B38              | 7C01   | CB6               | 7C8V   | SR4              |
| 7C8W   | MR17             | 7CAH   | H014              | 7CAN   | MR17-K99Y        |
| 7CDI   | P2C-1F11         | 7CDJ   | P2C-1A3           | 7CH4   | BD-604           |
| 7CH5   | BD-629           | 7CHB   | BD-236            | 7CHE   | BD-236/BD-368-2  |
| 7CHF   | BD-604/BD-368-2  | 7CHH   | BD-368-2          | 7CJF   | A fab            |
| 7CM4   | CT-P59           | 7CWM   | P17               | 7CWN   | P17/H014         |
| 7JMO   | COVA2-04         | 7JMP   | COVA2-39          | 7JMW   | COVA1-16         |
| 7JV6   | S2H13            | 7JVA   | S2A4              | 7JW0   | S304             |
| 7JWB   | VH binder        | 7JX3   | S309/S2H14/S304   | 7K43   | S2M11            |
| 7K45   | S2E12            | 7K8M   | C102              | 7K8T   | C002             |
| 7K8U   | C104             | 7K8V   | C110              | 7K8W   | C119             |
| 7K8X   | C121             | 7K8Z   | C135              | 7K90   | C144             |
| 7K9Z   | Fabs 298/52      | 7KFV   | C1A-B12           | 7KFW   | C1A-B3           |
| 7KFX   | C1A-C2           | 7KFY   | C1A-F10           | 7KMG   | LY-CoV555        |
| 7KMH   | LY-CoV488        | 7KMI   | LY-CoV481         | 7KN5   | VHH E/U          |
| 7KN6   | VHH V/Fab CC12.3 | 7KN7   | VHH W/Fab CC12.3  | 7KZB   | CR3014-C8/CR3022 |
| 7LD1   | DH1047           | 7EAM   | 7D6               | 7LSS   | Fab 2-7          |
| 7LAA   | DH1041           | 7LS9   | 1-57              | 7D0B   | P5A-3C12.1B      |
| 7CZW   | P5A-2G7          | 7D00   | P5A-1B8           | 7D0C   | P5A-3A1          |
| 7D0D   | P5A-3C12.2B      | 7CZX   | P5A-1B9           | 7CZY   | P5A-2F11.2B      |
| 7CZV   | P5A-1B6.3B       | 7CZZ   | P5A-2F11.3B       | 7CZP   | P2B-1A1          |
| 7CZQ   | P2B-1A10         | 7CZT   | P5A-2G9           | 7CZU   | P5A-1B6.2B       |
| 7CZR   | P5A-1B8.2B       | 7CZS   | P5A-1B8.3B        | 7BEL   | COVOX-88/-45     |
| 7BEM   | COVOX-269 scFV   | 7BEJ   | COVOX-158         | 7BEP   | COVOX-384/S309   |
| 7BEN   | COVOX-253/-75    | 7BEO   | COVOX-253H55L/-75 | 7BEH   | COVOX-316        |
| 7BEI   | COVOX-150        | 7NDA   | COVOX-253H55L     | 7NDB   | COVOX-253H165L   |
| 7ND8   | COVOX-384        | 7ND6   | COVOX-40          | 7ND4   | COVOX-88         |
| 7LOP   | CV05-163/CR3022  | 7DPM   | MW06              | 7KS9   | 910-30           |
| 7L5B   | 2-51             | 6M0J   | ACE2              |        |                  |

## S3 Supplementary Data

The Supplementary\_Data.zip contains two folders:

1. SNP Data: A total of 31 CSV files for the SARS-CoV-2 S protein RBD SNP data from 31 different countries.
2. Fast Grow: A total of 31 HTML files for the log growth rates and log frequencies of specific SARS-CoV-2 S protein RBD mutations in 31 different countries.



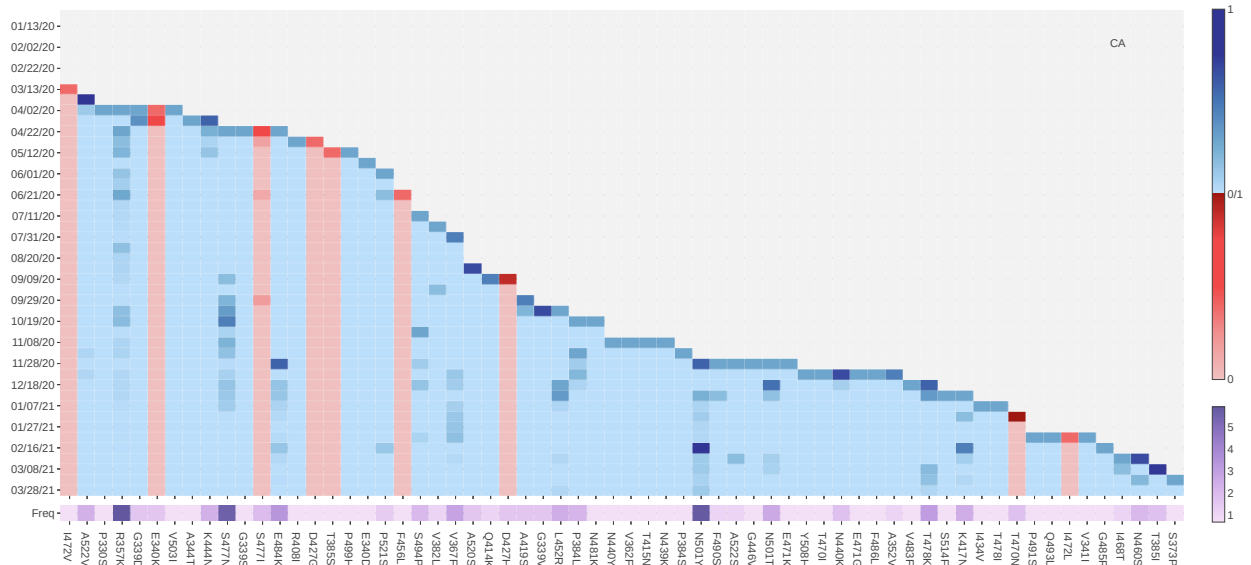

Figure S7: The log growth rate and log frequency of mutations on S protein RBD in the Canada. The blue and red colors respectively represent the binding-strengthening and binding-weakening mutations on RBD. The darker blue/red means the binding-strengthening/binding-weakening mutations with a higher growth rate in a specific 10-day period. The darker purple represents the mutation with a higher log frequency.

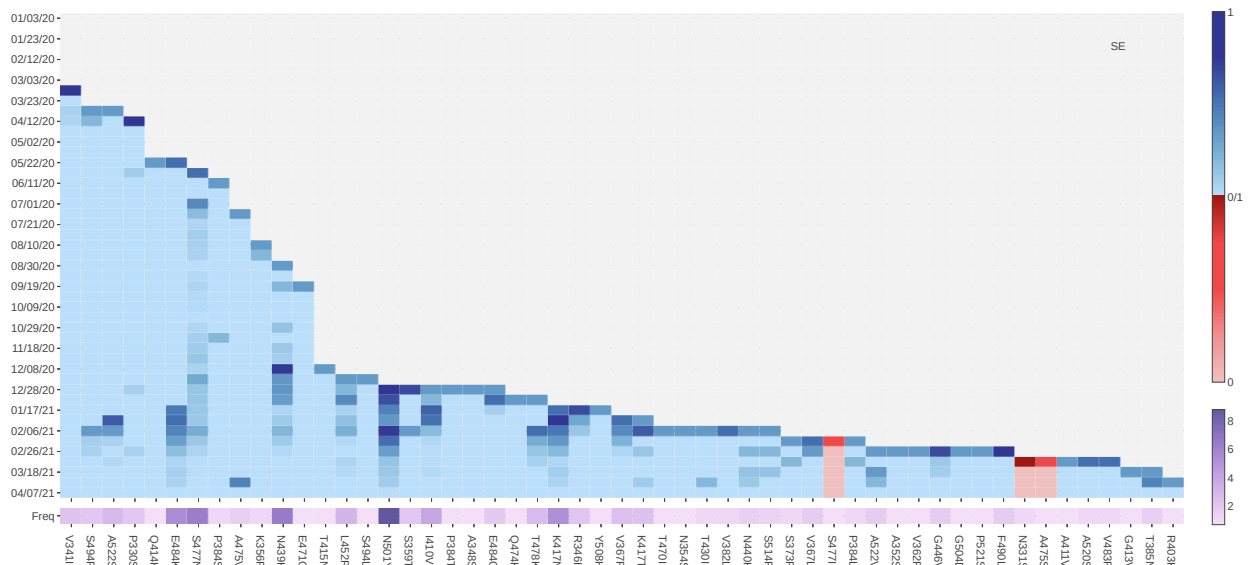

Figure S8: The log growth rate and log frequency of mutations on S protein RBD in the Sweden. The blue and red colors respectively represent the binding-strengthening and binding-weakening mutations on RBD. The darker blue/red means the binding-strengthening/binding-weakening mutations with a higher growth rate in a specific 10-day period. The darker purple represents the mutation with a higher log frequency.

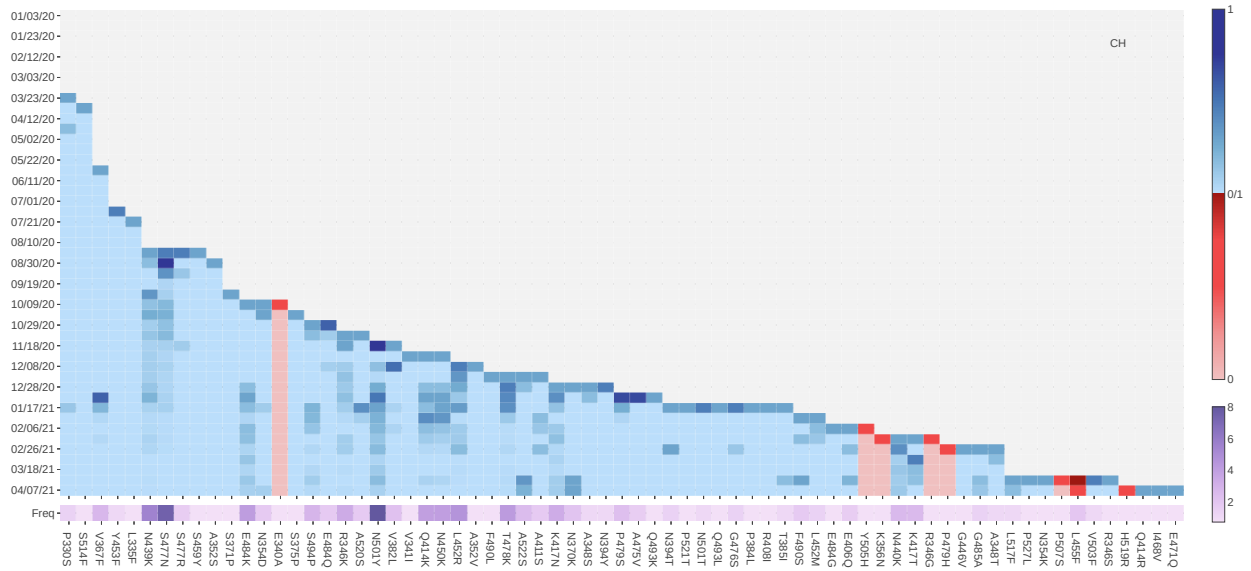

Figure S9: The log growth rate and log frequency of mutations on S protein RBD in the Switzerland. The blue and red colors respectively represent the binding-strengthening and binding-weakening mutations on RBD. The darker blue/red means the binding-strengthening/binding-weakening mutations with a higher growth rate in a specific 10-day period. The darker purple represents the mutation with a higher log frequency.

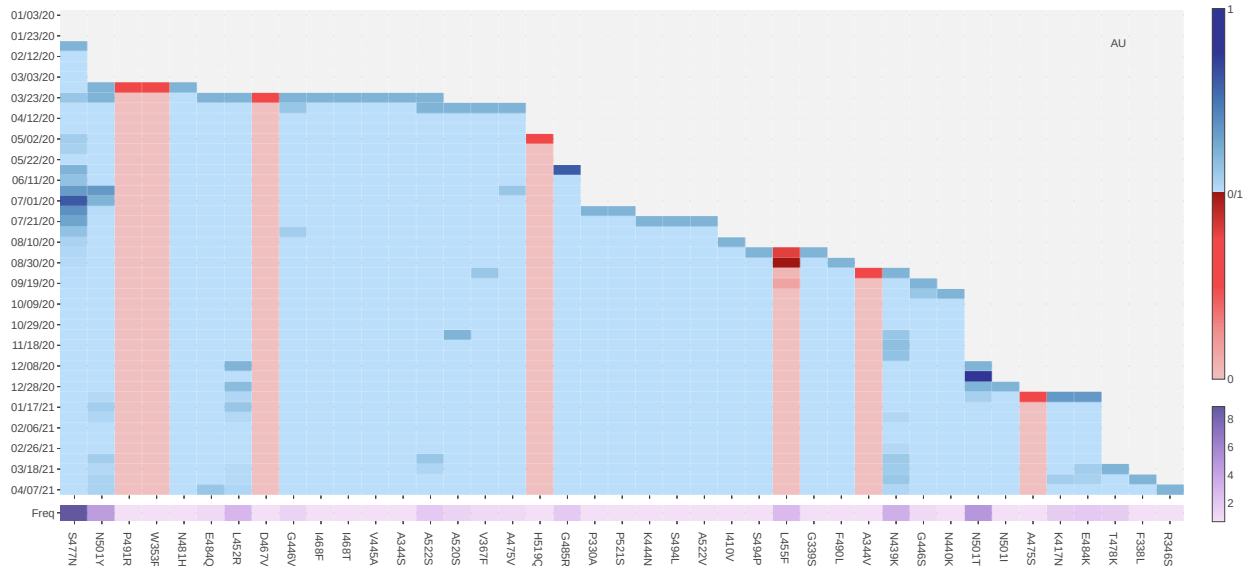

Figure S10: The log growth rate and log frequency of mutations on S protein RBD in the Australia. The blue and red colors respectively represent the binding-strengthening and binding-weakening mutations on RBD. The darker blue/red means the binding-strengthening/binding-weakening mutations with a higher growth rate in a specific 10-day period. The darker purple represents the mutation with a higher log frequency.

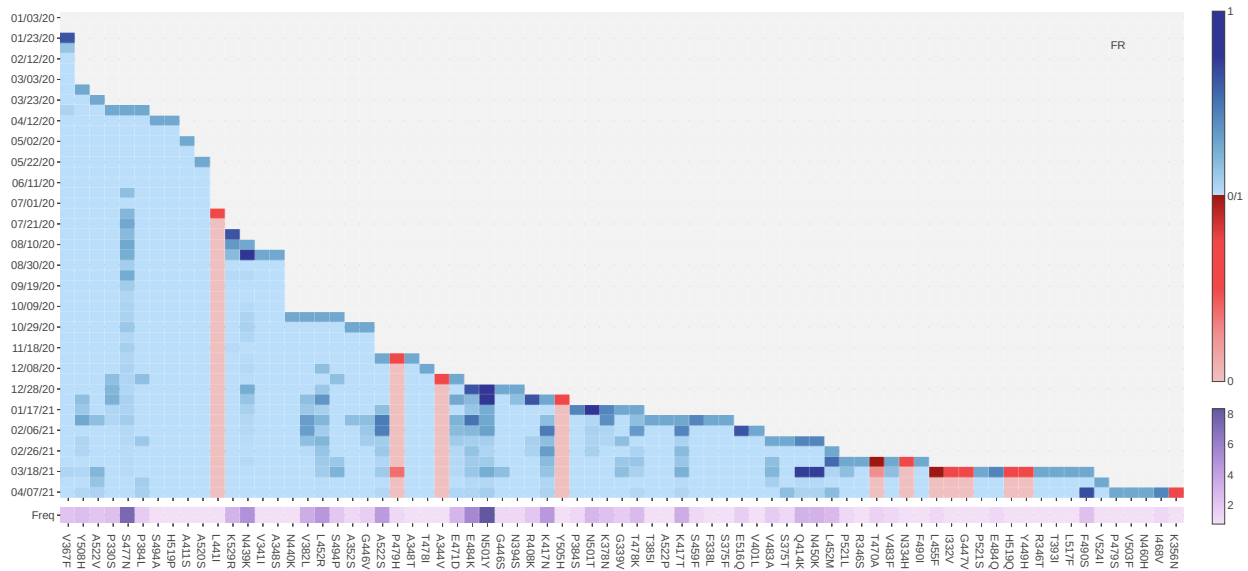

Figure S11: The log growth rate and log frequency of mutations on S protein RBD in the France. The blue and red colors respectively represent the binding-strengthening and binding-weakening mutations on RBD. The darker blue/red means the binding-strengthening/binding-weakening mutations with a higher growth rate in a specific 10-day period. The darker purple represents the mutation with a higher log frequency.

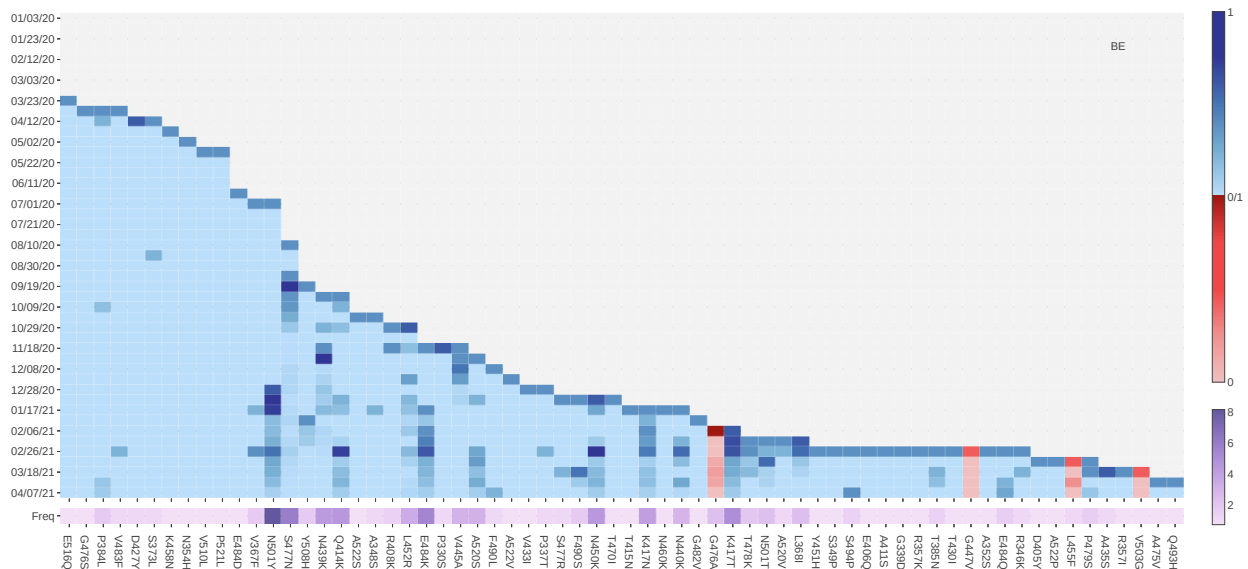

Figure S12: The log growth rate and log frequency of mutations on S protein RBD in the Belgium. The blue and red colors respectively represent the binding-strengthening and binding-weakening mutations on RBD. The darker blue/red means the binding-strengthening/binding-weakening mutations with a higher growth rate in a specific 10-day period. The darker purple represents the mutation with a higher log frequency.





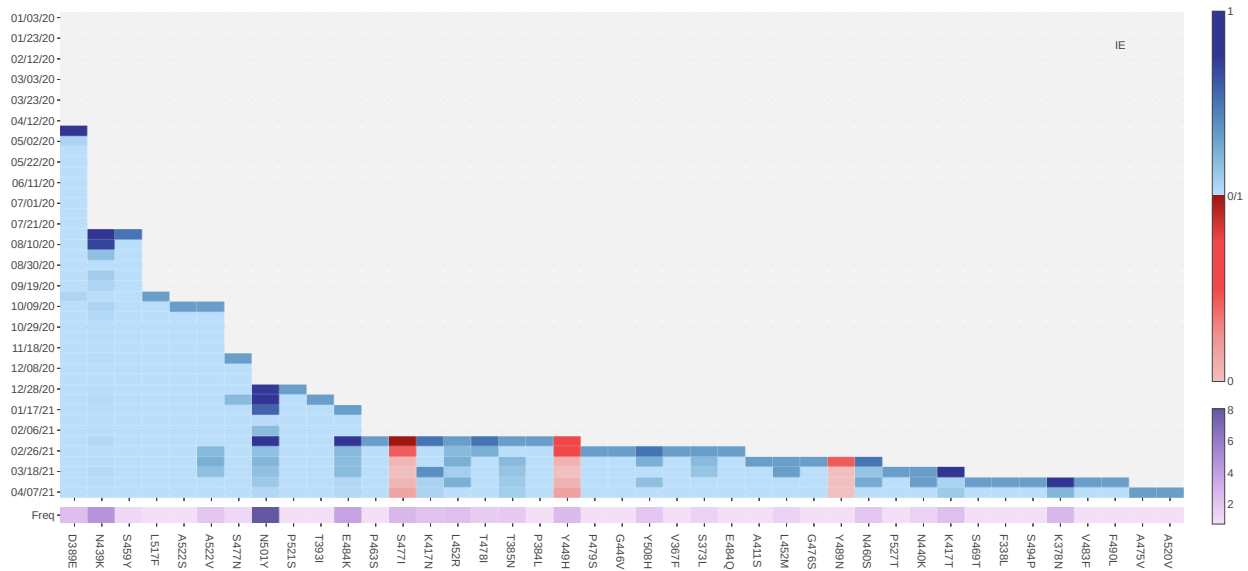

Figure S15: The log growth rate and log frequency of mutations on S protein RBD in the Ireland. The blue and red colors respectively represent the binding-strengthening and binding-weakening mutations on RBD. The darker blue/red means the binding-strengthening/binding-weakening mutations with a higher growth rate in a specific 10-day period. The darker purple represents the mutation with a higher log frequency.

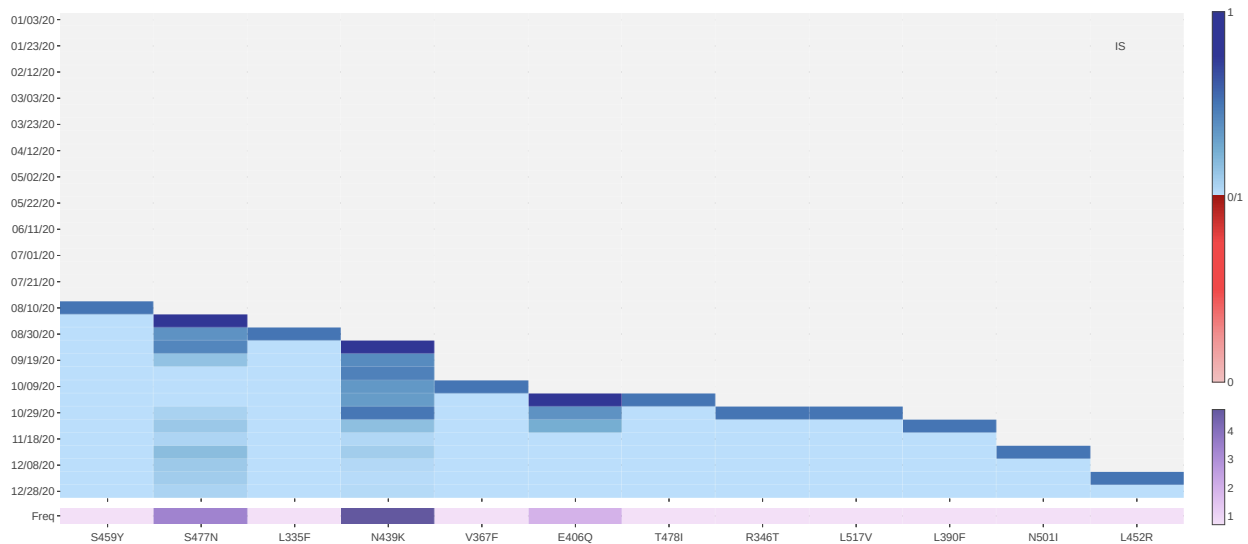

Figure S16: The log growth rate and log frequency of mutations on S protein RBD in the Iceland. The blue and red colors respectively represent the binding-strengthening and binding-weakening mutations on RBD. The darker blue/red means the binding-strengthening/binding-weakening mutations with a higher growth rate in a specific 10-day period. The darker purple represents the mutation with a higher log frequency.

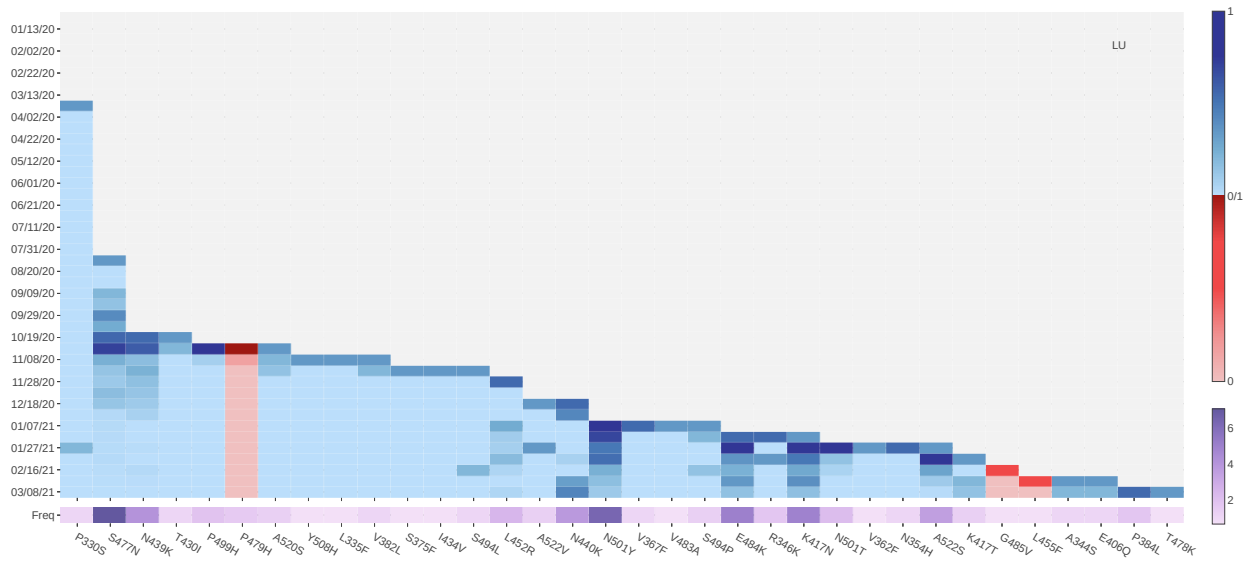

Figure S17: The log growth rate and log frequency of mutations on S protein RBD in the Luxembourg. The blue and red colors respectively represent the binding-strengthening and binding-weakening mutations on RBD. The darker blue/red means the binding-strengthening/binding-weakening mutations with a higher growth rate in a specific 10-day period. The darker purple represents the mutation with a higher log frequency.

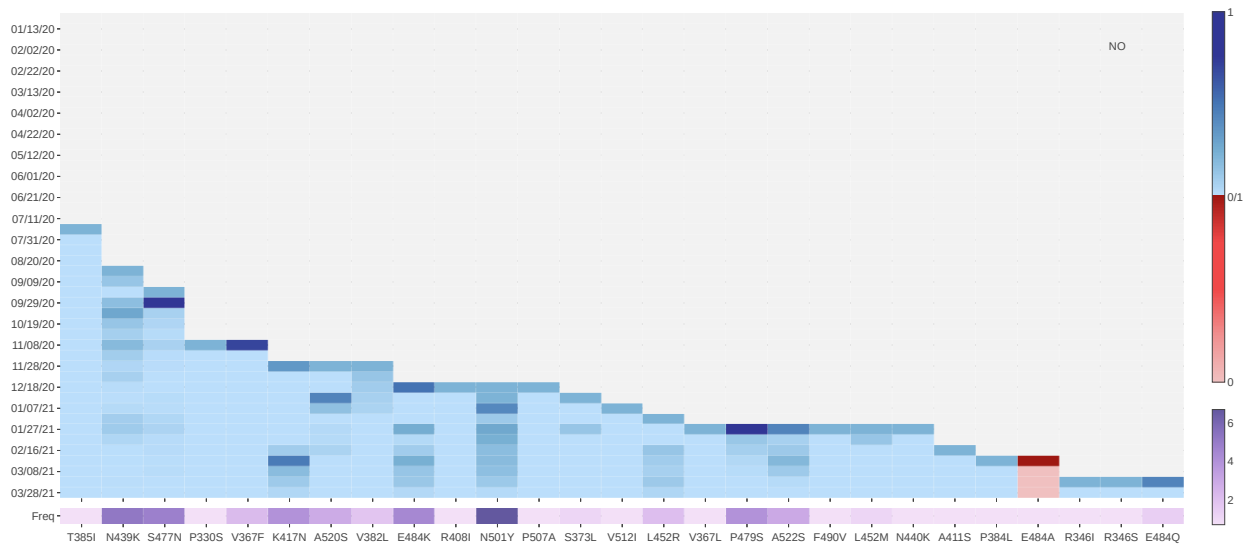

Figure S18: The log growth rate and log frequency of mutations on S protein RBD in the Norway. The blue and red colors respectively represent the binding-strengthening and binding-weakening mutations on RBD. The darker blue/red means the binding-strengthening/binding-weakening mutations with a higher growth rate in a specific 10-day period. The darker purple represents the mutation with a higher log frequency.

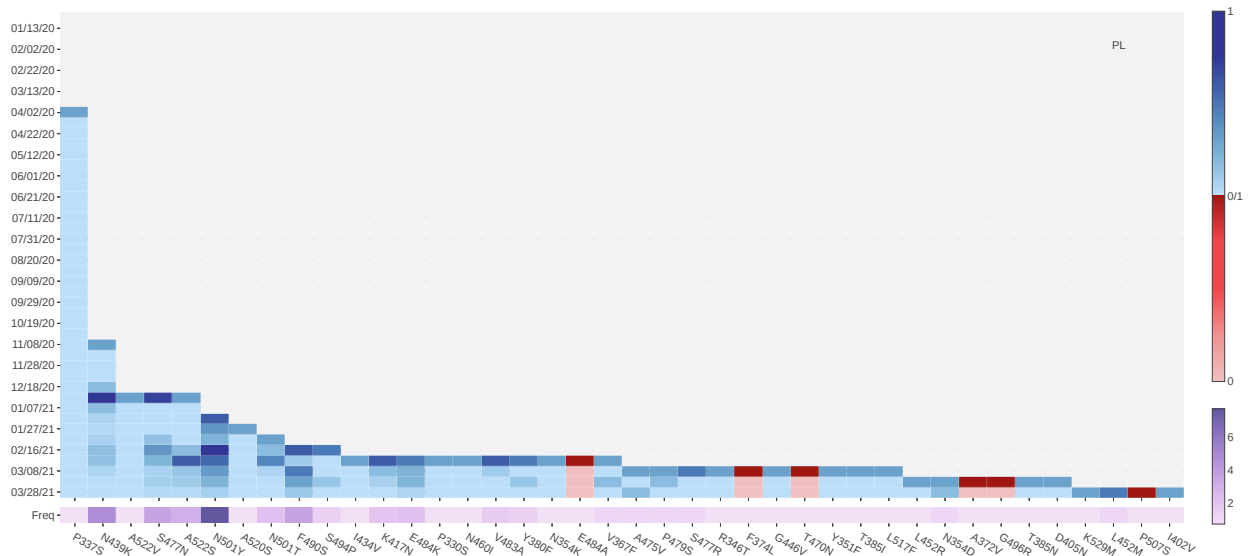

Figure S19: The log growth rate and log frequency of mutations on S protein RBD in the Poland. The blue and red colors respectively represent the binding-strengthening and binding-weakening mutations on RBD. The darker blue/red means the binding-strengthening/binding-weakening mutations with a higher growth rate in a specific 10-day period. The darker purple represents the mutation with a higher log frequency.

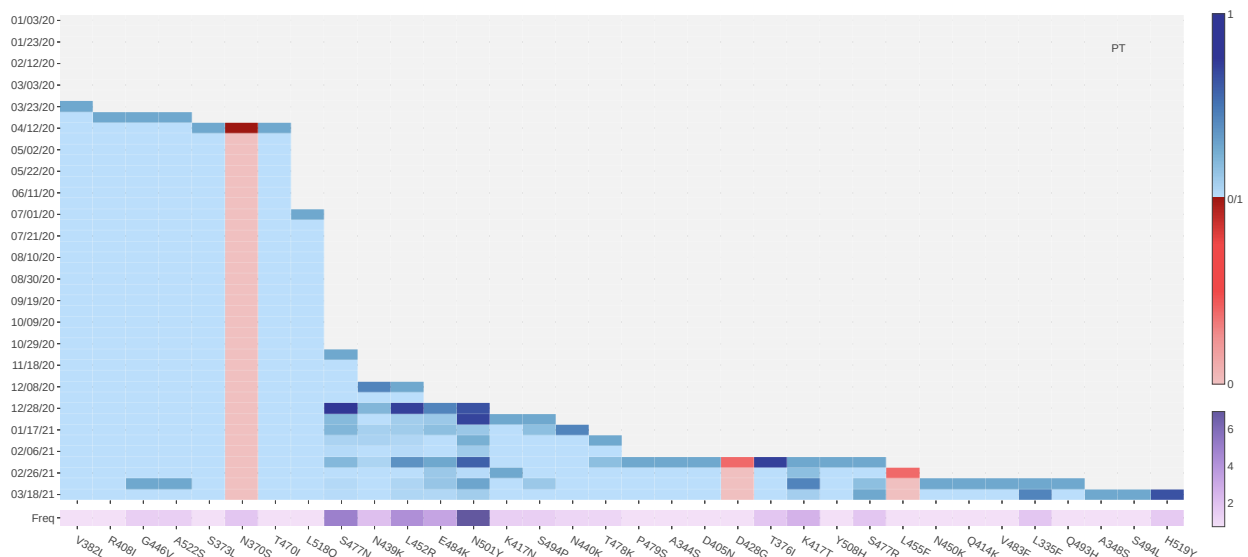

Figure S20: The log growth rate and log frequency of mutations on S protein RBD in the Portugal. The blue and red colors respectively represent the binding-strengthening and binding-weakening mutations on RBD. The darker blue/red means the binding-strengthening/binding-weakening mutations with a higher growth rate in a specific 10-day period. The darker purple represents the mutation with a higher log frequency.

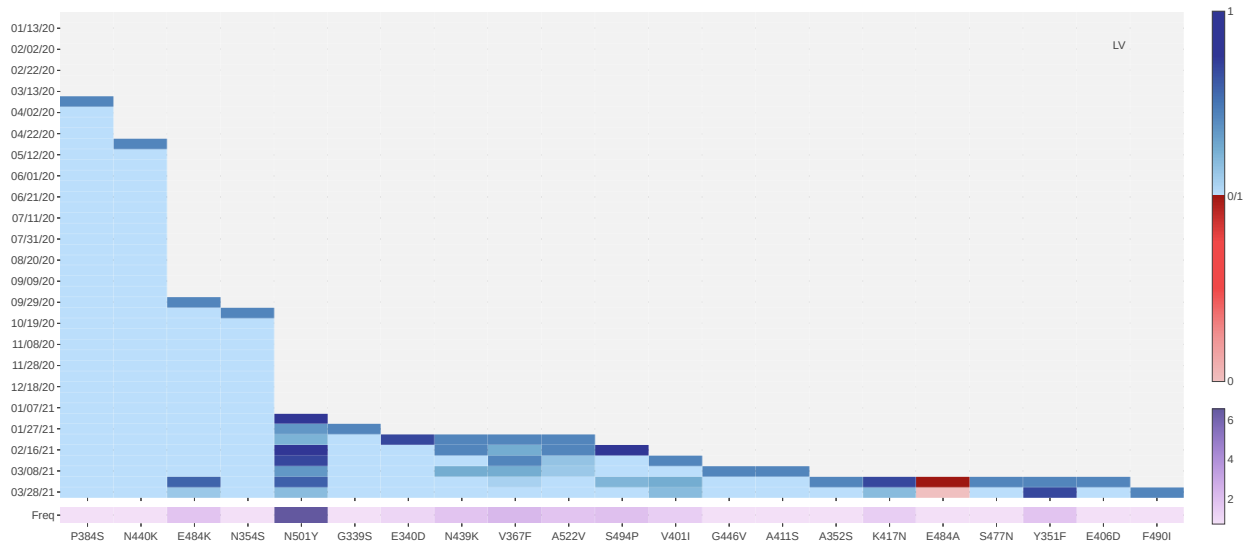

Figure S21: The log growth rate and log frequency of mutations on S protein RBD in the Latvia. The blue and red colors respectively represent the binding-strengthening and binding-weakening mutations on RBD. The darker blue/red means the binding-strengthening/binding-weakening mutations with a higher growth rate in a specific 10-day period. The darker purple represents the mutation with a higher log frequency.

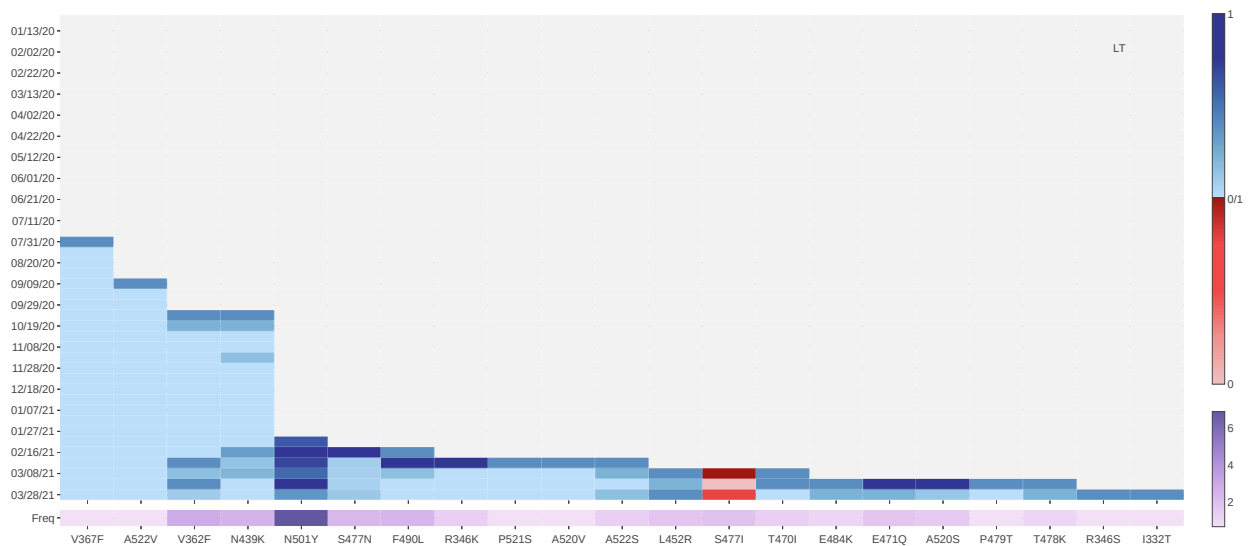

Figure S22: The log growth rate and log frequency of mutations on S protein RBD in the Lithuania. The blue and red colors respectively represent the binding-strengthening and binding-weakening mutations on RBD. The darker blue/red means the binding-strengthening/binding-weakening mutations with a higher growth rate in a specific 10-day period. The darker purple represents the mutation with a higher log frequency.

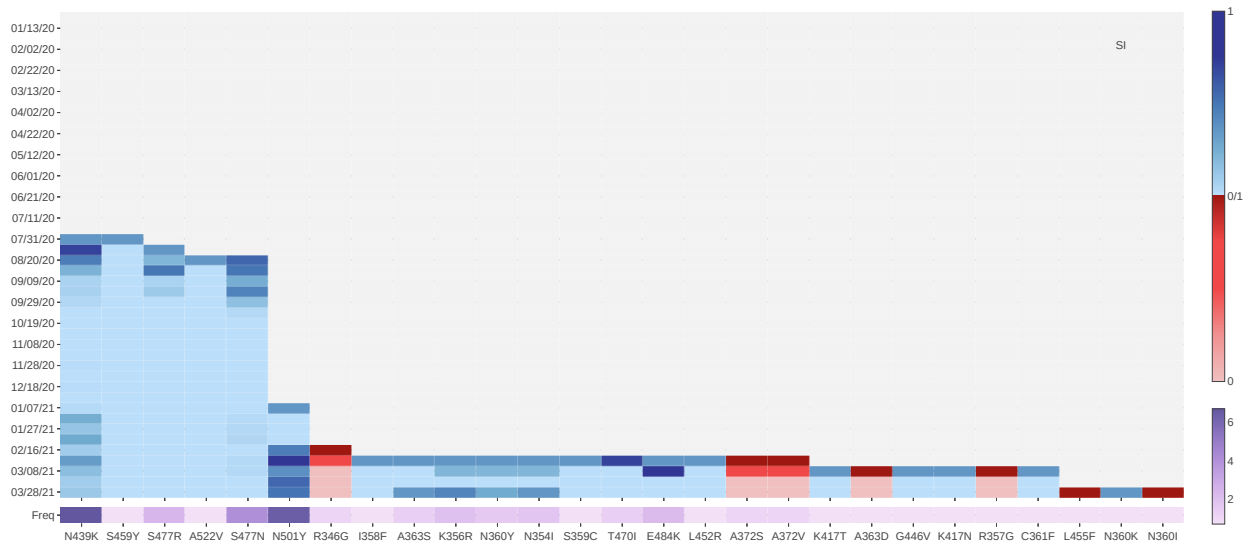

Figure S23: The log growth rate and log frequency of mutations on S protein RBD in the Slovenia. The blue and red colors respectively represent the binding-strengthening and binding-weakening mutations on RBD. The darker blue/red means the binding-strengthening/binding-weakening mutations with a higher growth rate in a specific 10-day period. The darker purple represents the mutation with a higher log frequency.

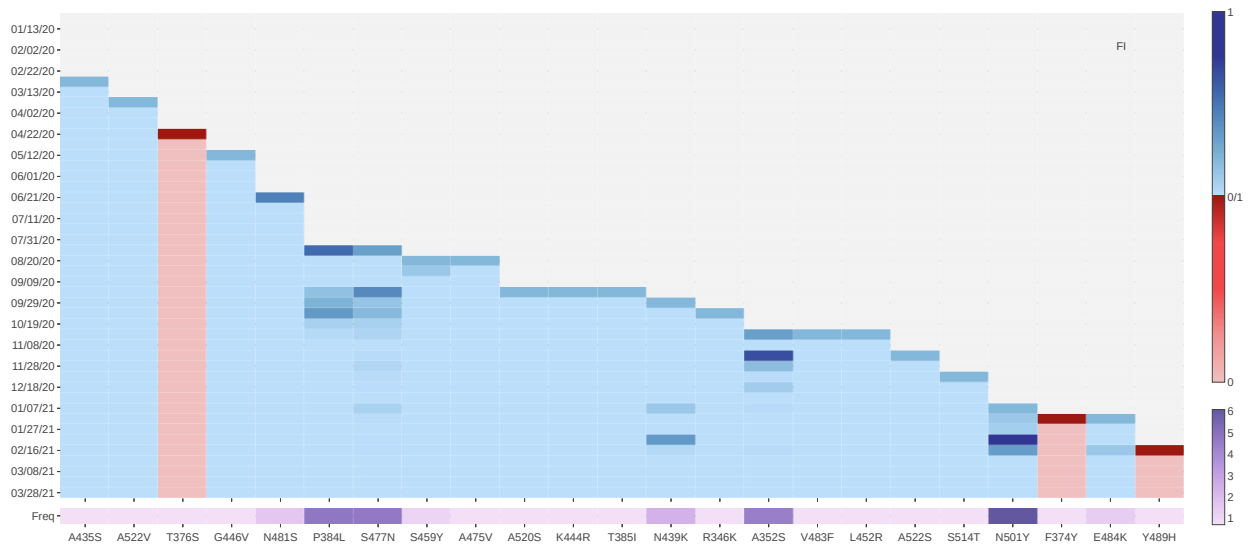

Figure S24: The log growth rate and log frequency of mutations on S protein RBD in the Finland. The blue and red colors respectively represent the binding-strengthening and binding-weakening mutations on RBD. The darker blue/red means the binding-strengthening/binding-weakening mutations with a higher growth rate in a specific 10-day period. The darker purple represents the mutation with a higher log frequency.

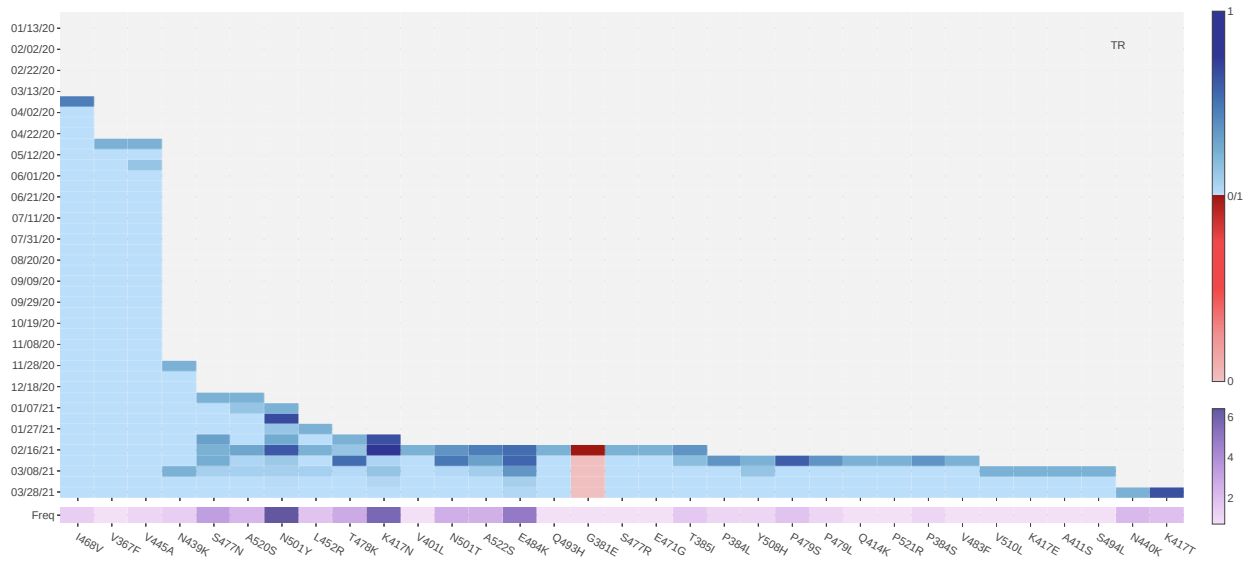

Figure S25: The log growth rate and log frequency of mutations on S protein RBD in the Turkey. The blue and red colors respectively represent the binding-strengthening and binding-weakening mutations on RBD. The darker blue/red means the binding-strengthening/binding-weakening mutations with a higher growth rate in a specific 10-day period. The darker purple represents the mutation with a higher log frequency.

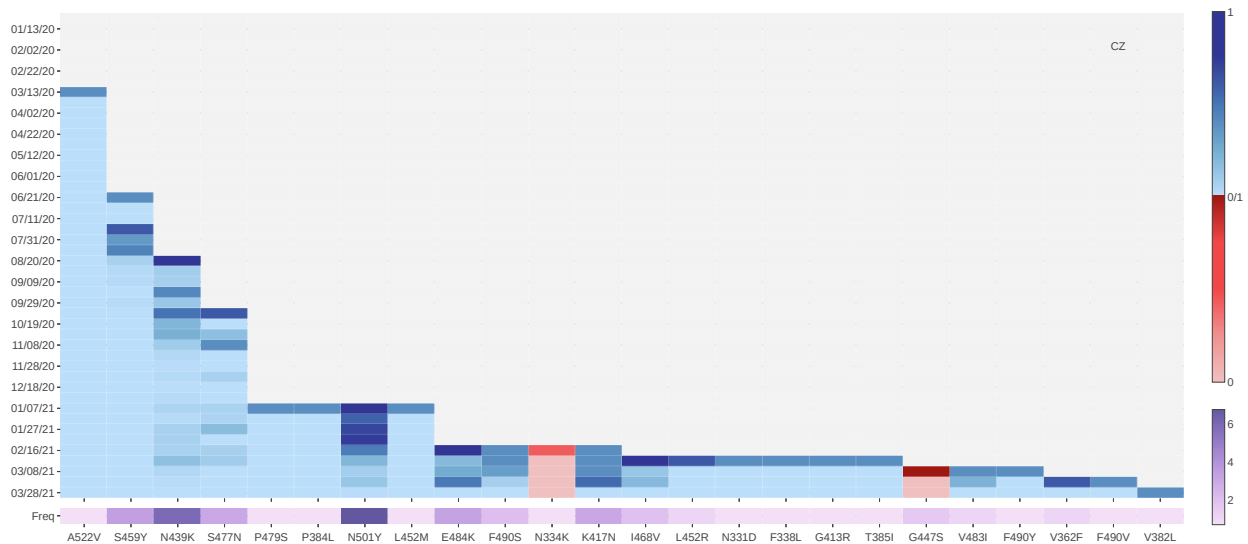

Figure S26: The log growth rate and log frequency of mutations on S protein RBD in the Czech Republic. The blue and red colors respectively represent the binding-strengthening and binding-weakening mutations on RBD. The darker blue/red means the binding-strengthening/binding-weakening mutations with a higher growth rate in a specific 10-day period. The darker purple represents the mutation with a higher log frequency.

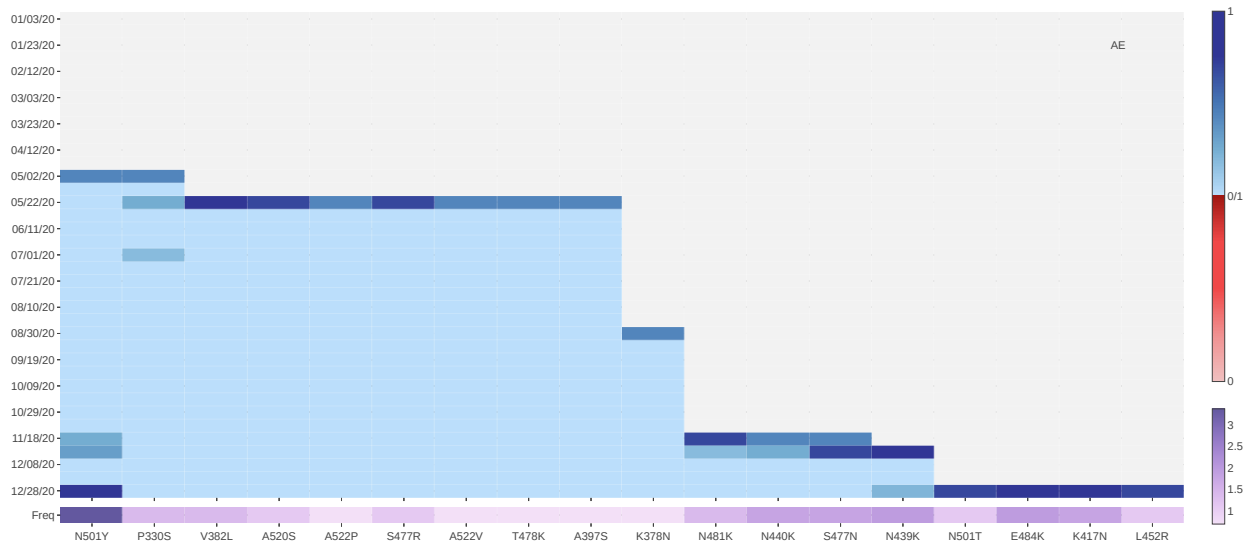

Figure S27: The log growth rate and log frequency of mutations on S protein RBD in the United Arab Emirates. The blue and red colors respectively represent the binding-strengthening and binding-weakening mutations on RBD. The darker blue/red means the binding-strengthening/binding-weakening mutations with a higher growth rate in a specific 10-day period. The darker purple represents the mutation with a higher log frequency.

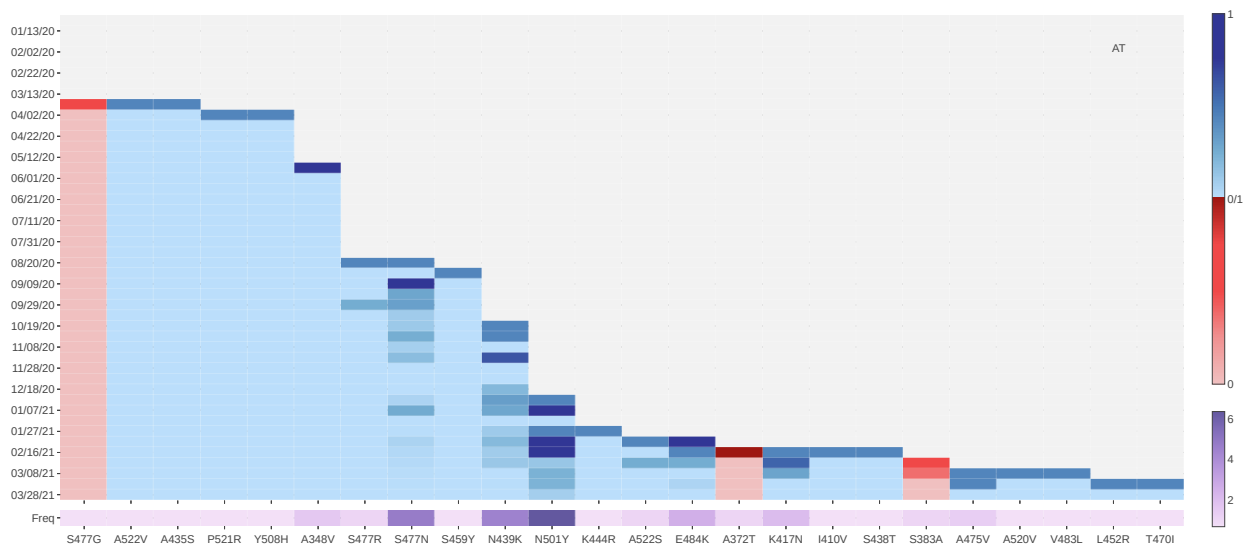

Figure S28: The log growth rate and log frequency of mutations on S protein RBD in the Austria. The blue and red colors respectively represent the binding-strengthening and binding-weakening mutations on RBD. The darker blue/red means the binding-strengthening/binding-weakening mutations with a higher growth rate in a specific 10-day period. The darker purple represents the mutation with a higher log frequency.
